# Supplementary material for: Identification of ADGRE5 as discriminating MYC target between Burkitt lymphoma and diffuse large B-cell lymphoma
Source: PubMed Central journal article supplement (PMC6451309; doi:10.1186/s12885-019-5537-0), 2019-04-05
Supplement: 12885_2019_5537_MOESM1_ESM.pdf [file 12885_2019_5537_MOESM1_ESM.pdf]

| Primary Antibody           |                |                |             |    |     |
|----------------------------|----------------|----------------|-------------|----|-----|
| Target protein             | Catalog #      | Company        | application |    |     |
|                            |                |                | ChIP        | WB | IHC |
| c-myc                      | ab32072        | Abcam          |             | X  | X   |
| c-myc                      | SC 764 / N-262 | SantaCruz      | X           |    |     |
| BYSL                       | ab194961       | Abcam          |             | X  |     |
| NPM1                       | TC-161991      | Thermo Fisher  |             | X  |     |
| Histone H3K4me3            | C15410003      | Diagenode      | X           |    |     |
| Histone 3 *                | 3638S          | Cell Signaling |             | X  |     |
| GAPDH *                    | 2118S          | Cell Signaling |             | X  |     |
| beta actin *               | Ab6276         | Abcam          |             | X  |     |
| ADGRE5 (CD97)              | HPA013707      | Sigma          |             | X  | X   |
| Secondary Antibody         |                |                |             |    |     |
| Target                     | Catalog        | Company        | ChIP        | WB | IHC |
| Anti-mouse HRP conjugated  | P0447          | Agilent        |             | X  |     |
| Anti-rabbit HRP conjugated | NA934V         | GE Healthcare  |             | X  |     |
| TAQ-MAN RT-PCR probes      |                |                |             |    |     |
| Target for TaqMan Assay    | Assay ID       | Company        |             |    |     |
| FARSA                      | Hs00189494_m1  | Thermo Fisher  |             |    |     |
| LARS                       | Hs00219931_m1  | Thermo Fisher  |             |    |     |
| BYSL                       | custom made    | Thermo Fisher  |             |    |     |
| CD30                       | custom made    | Thermo Fisher  |             |    |     |
| TERT                       | Hs00972650_m1  | Thermo Fisher  |             |    |     |
| NPM1                       | Hs02339479_g1  | Thermo Fisher  |             |    |     |
| ADGRE5 (CD97)              | Hs00173542_m1  | Thermo Fisher  |             |    |     |
| SMAD1                      | Hs01077084_m1  | Thermo Fisher  |             |    |     |
| CDK20                      | Hs01114921_m1  | Thermo Fisher  |             |    |     |
| ZAP70                      | Hs00896345_m1  | Thermo Fisher  |             |    |     |
| GPAM                       | Hs00326039_m1  | Thermo Fisher  |             |    |     |
| MYC                        | Hs00153408_m1  | Thermo Fisher  |             |    |     |
| B2M*                       | Hs00984230_m1  | Thermo Fisher  |             |    |     |
| SDHA*                      | Hs00417200_m1  | Thermo Fisher  |             |    |     |

**S1 Table. Compilation of antibodies used for Chromatin Immunoprecipitation (ChIP), Western Blot (WB) or Immunohistochemistry (IHC) and list of TaqMan Assays used for RT-PCR analysis. \*indicated endogenous control.**
