# Supplementary material for: Identification of ADGRE5 as discriminating MYC target between Burkitt lymphoma and diffuse large B-cell lymphoma
Source: PubMed Central journal article supplement (PMC6451309; doi:10.1186/s12885-019-5537-0), 2019-04-05
Supplement: 12885_2019_5537_MOESM4_ESM.pdf [file 12885_2019_5537_MOESM4_ESM.pdf]

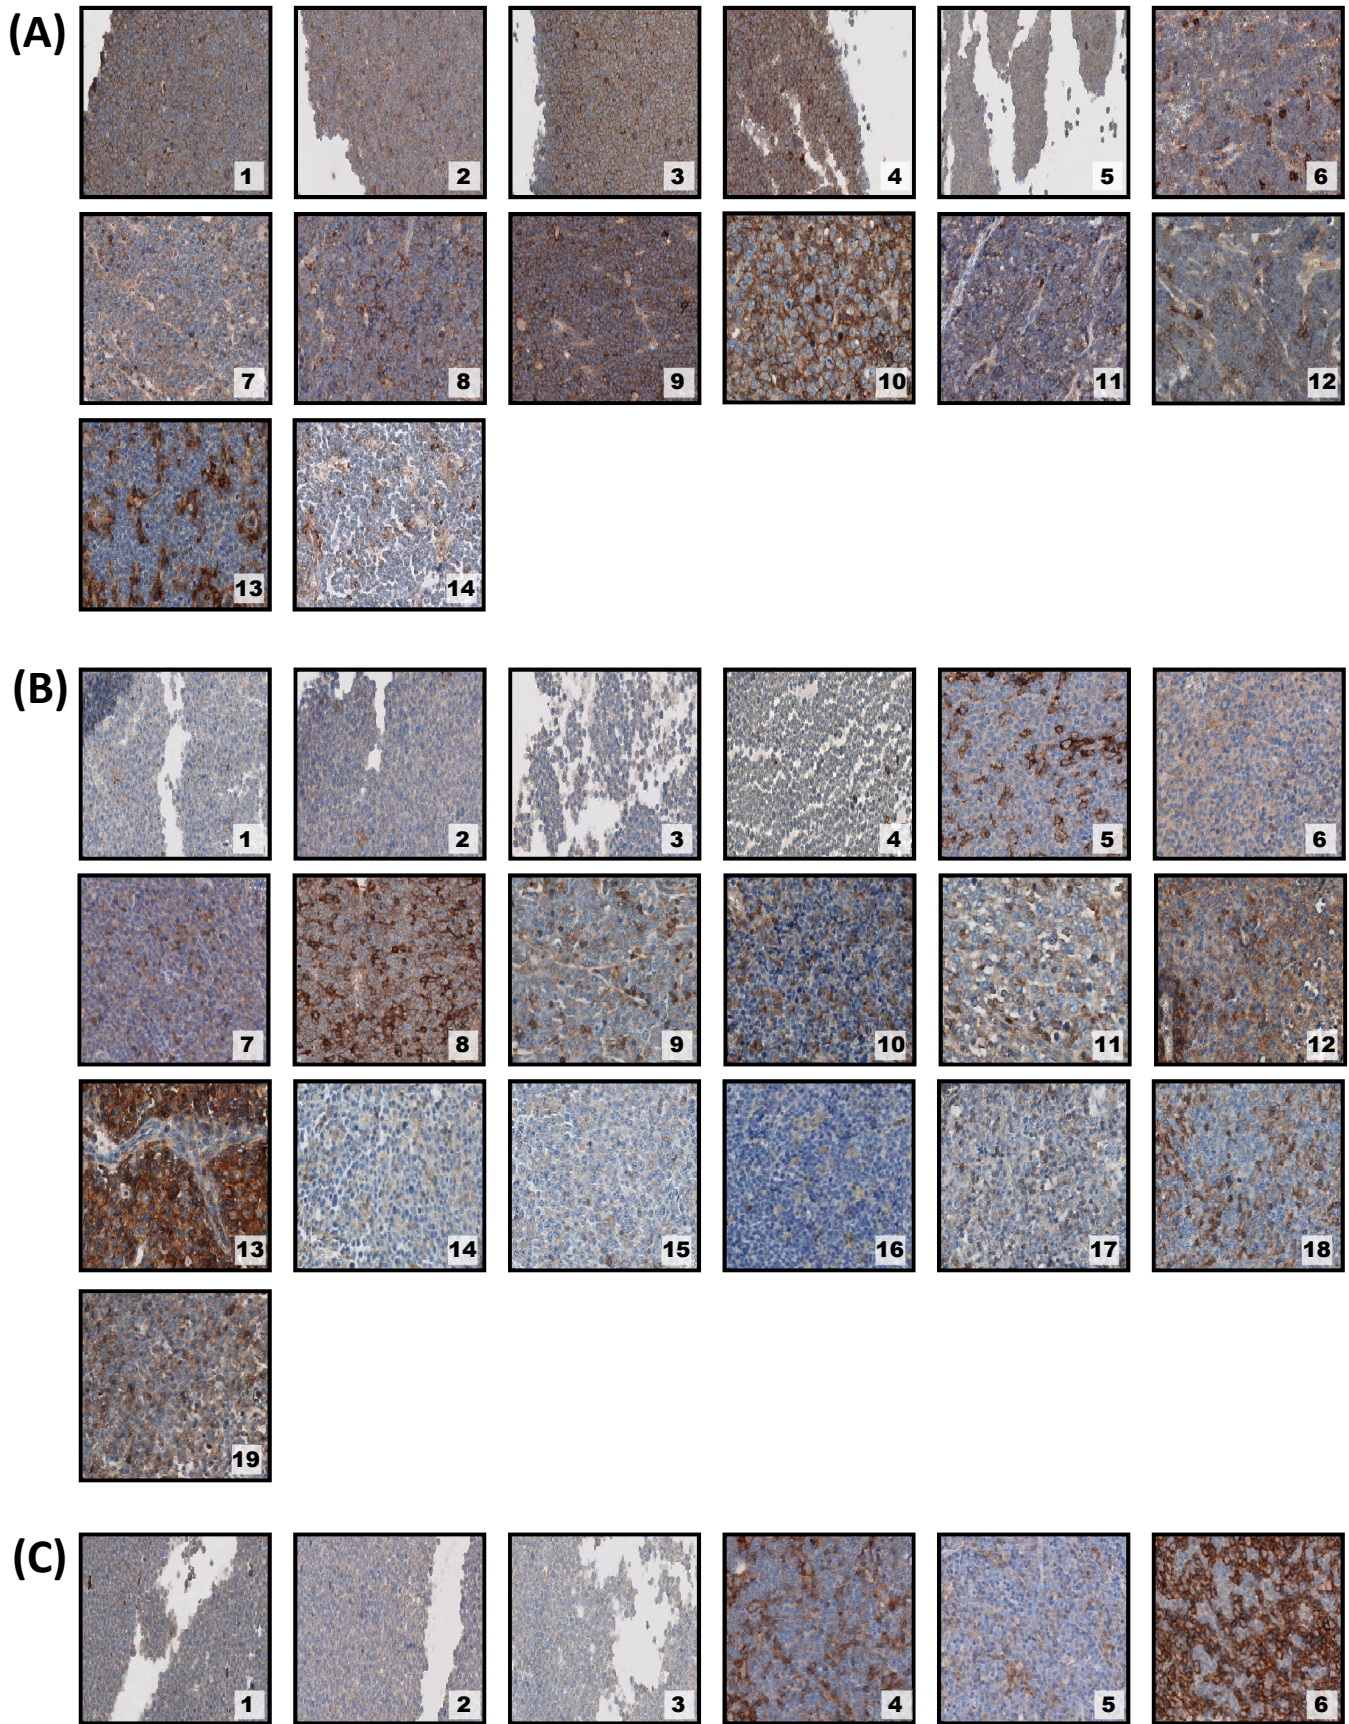

**S4 Figure. ADGRE5 IHC staining of cell line and patient tissue samples.** (A) Burkitt Lymphoma (BL): Cell lines (1-5: Blue-1 BL-41, BL-2, DG-75, CA-46) and primary tumor tissues (7-14) are mainly ADGRE5 positive. (B) Diffuse large B-cell lymphoma without MYC break (DLBCLneg): Cell lines (1-4: Karpas-422, U2932-R1, HT, WSU-DLCL2) and primary tumor tissues (5-19). (C) DLBCLpos: Cell lines (1-3: Carnaival, U2932-R2, SU-DHL-10) and primary tumor tissues (4-6). DLBCLpos and DLBCLneg are mainly negative for ADGRE5. Strong positive staining in some tissue sections results from macrophages or T-cells.
